# Supplementary material for: Modeling historical tuberculosis epidemics among Canadian First Nations: effects of malnutrition and genetic variation
Source: PeerJ. 2015 Sep 24;3:e1237. doi: 10.7717/peerj.1237 (PMC4586807; doi:10.7717/peerj.1237)
Supplement: Supplemental Information 2 — Raw data used in our analysis: TB Mortality and Census Data for 1883–1940. [file peerj-03-1237-s002.xlsx]

## Sheet: Census Cluster 1
Year	Population
1883	1072
1884	1030
1885	863
1886	781
1887	630
1888	630
1891	552
1892	530
1893	534
1904	362
1914	402
1917	419
1929	468
1934	504
1939	605

## Sheet: Mortality Cluster 1
Year	Deaths
1885	3
1886	49
1887	28
1888	22
1889	22
1890	40
1891	30
1892	20
1893	15
1894	20
1895	9
1896	18
1897	11
1898	15
1899	8
1900	4
1901	1
1902	11
1903	10
1904	7
1905	3
1906	8
1907	5
1908	4
1909	0
1910	0
1911	0
1912	0
1913	0
1914	0
1915	0
1916	1
1917	0
1918	0
1919	1
1920	6
1921	5
1922	5
1923	3
1924	5
1925	4
1926	10
1927	8
1928	1
1929	5
1930	7
1931	4
1932	6
1933	4
1934	5
1935	6
1936	1
1937	5
1938	3
1939	2
1940	3

## Sheet: Census Cluster 2
Year	Population
1883	611
1884	613
1885	564
1886	462
1891	405
1892	422
1893	419
1904	415
1914	443
1934	603
1939	662

## Sheet: Mortality Cluster 2
Year	Deaths
1897	11
1898	24
1899	1
1900	7
1901	10
1902	3
1903	5
1904	0
1905	8
1906	4
1907	2
1908	6
1909	2
1910	2
1911	6
1912	3
1913	2
1914	5
1915	3
1916	2
1917	5
1918	4
1919	3
1920	3
1921	5
1922	4
1923	5
1924	0
1925	3
1926	0
1927	0
1928	0
1929	5
1930	4
1931	4
1932	0
1933	1
1934	1
1935	0
1936	0
1937	0
1938	1
1939	0
1940	0
